# Supplementary material
Source: Springer Nature journal article supplement (https://www.springermedizin.de/resource/supplementary/12967_2006_166_MOESM3_ESM.pdf/9575974)

AQUA Score

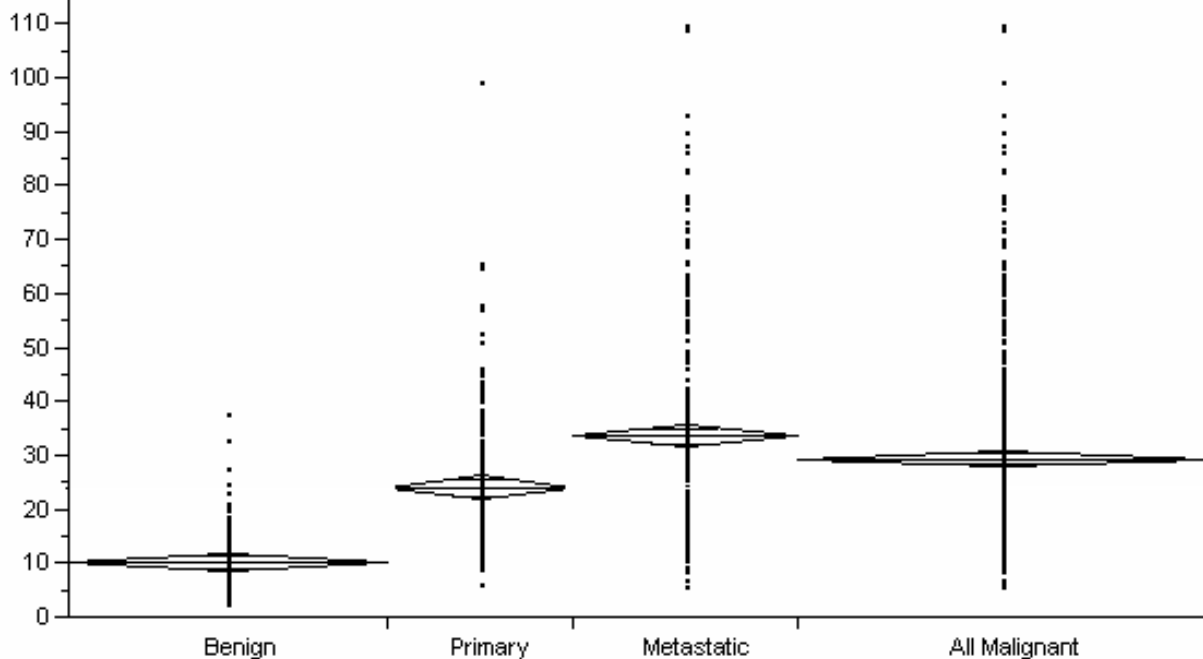

Supplement: MOESM3 [file 9575974]
